# Supplementary material for: Preservation of genetic and regulatory robustness in ancient gene duplicates of Saccharomyces cerevisiae
Source: HighWire-hosted journal article supplement (doi:10.1101/gr.176792.114), 2014-08-22
Supplement: Supplemental_information.docx [file Supplemental_information.docx]

**SUPPLEMENTARY INFORMATION**

**Preservation of Genetic and Regulatory Robustness in Ancient Gene Duplicates of S*accharomyces cerevisiae***

Orla M. Keane, Christina Toft, Lorenzo Carretero-Paulet, Gary W. Jones and Mario A. Fares

**SUPPLEMENTARY TABLE LEGENDS**

**Table S1**. Genome sequencing and annotation of single nucleotide polymorphisms (SNPs), deletions and insertions in the genome of *Saccharomyces cerevisiae* for the first evolution line (Msh2-1). Mutations for each of the isolation points (Msh2-1 passage 20 to passage 100) were identified and compared to that of the ancestor. The presence of the mutation at each time point is indicated and its absence is labeled with -. The chromosome, position, type of mutation, annotation of the mutation, gene affected, and gene annotation are indicated.

**Table S2**. Genome sequencing and annotation of single nucleotide polymorphisms (SNPs), deletions and insertions in the genome of *Saccharomyces cerevisiae* for the second evolution line (Msh2-2). Mutations for each of the isolation points (Msh2-2 passage 20 to passage 100) were identified and compared to that of the ancestor. The presence of the mutation at each time point is indicated and its absence is labeled with -. The chromosome, position, type of mutation, annotation of the mutation, gene affected, and gene annotation are indicated.

**Table S3**. Genome sequencing and annotation of single nucleotide polymorphisms (SNPs), deletions and insertions in the genome of *Saccharomyces cerevisiae* for the third evolution line (Msh2-3). Mutations for each of the isolation points (Msh2-3 passage 20 to passage 100) were identified and compared to that of the ancestor. The presence of the mutation at each time point is indicated and its absence is labeled with -. The chromosome, position, type of mutation, annotation of the mutation, gene affected, and gene annotation are indicated.

**Table S4**. Genome sequencing and annotation of single nucleotide polymorphisms (SNPs), deletions and insertions in the genome of *Saccharomyces cerevisiae* for the fourth evolution line (Msh2-4). Mutations for each of the isolation points (Msh2-4 passage 20 to passage 100) were identified and compared to that of the ancestor. The presence of the mutation at each time point is indicated and its absence is labeled with -. The chromosome, position, type of mutation, annotation of the mutation, gene affected, and gene annotation are indicated.

**Table S5**. Genome sequencing and annotation of single nucleotide polymorphisms (SNPs), deletions and insertions in the genome of *Saccharomyces cerevisiae* for the fifth evolution line (Msh2-5). Mutations for each of the isolation points (Msh2-5 passage 20, 50 and passage 90) were identified and compared to that of the ancestor. The presence of the mutation at each time point is indicated and its absence is labeled with -. The chromosome, position, type of mutation, annotation of the mutation, gene affected, and gene annotation are indicated.

**Table S6**. Cellular localization of gene duplicates in *Saccharomyces cerevisiae*. The sub-cellular localization of each of the gene copies of duplicates in *S. cerevisiae* was extracted using the GO functional annotation from the Munich Information Centre for Protein Sequences using the Comprehensive yeast Genome Database (MIPS *Saccharomyces cerevisiae* genome database: http://mips.helmholtz-muenchen.de/genre/proj/ yeast/singleGeneReport.html?entry = yer175c ([Guldener et al. 2005](#_ENREF_41)). Missing information is indicated (-).

**Table S7.** Gene duplicates are more plastic in their expression than singletons. We compared the variation in expression levels of duplicates to that of singletons under 32 conditions of stress (column 1 of the table). Second column refers to such expression variation for all duplicates, the third to that of singletons, the fourth variation of expression of whole-genome duplicates (WGDs), and the fifth refers to that of small-scale duplicates. Variation of expression was calculated as in equation (eq.4) of the manuscript. The reference to the studies that obtained the microarray data under each of the stress conditions is given in the sixth column of the table.

**References:**

Abbott DA, Suir E, van Maris AJ, Pronk JT. 2008. Physiological and transcriptional responses to high concentrations of lactic acid in anaerobic chemostat cultures of Saccharomyces cerevisiae. *Applied and environmental microbiology* **74**(18): 5759-5768.

Aguilera J, Petit T, de Winde JH, Pronk JT. 2005. Physiological and genome-wide transcriptional responses of Saccharomyces cerevisiae to high carbon dioxide concentrations. *FEMS yeast research* **5**(6-7): 579-593.

Alper H, Moxley J, Nevoigt E, Fink GR, Stephanopoulos G. 2006. Engineering yeast transcription machinery for improved ethanol tolerance and production. *Science* **314**(5805): 1565-1568.

Aragon AD, Quinones GA, Thomas EV, Roy S, Werner-Washburne M. 2006. Release of extraction-resistant mRNA in stationary phase Saccharomyces cerevisiae produces a massive increase in transcript abundance in response to stress. *Genome biology* **7**(2): R9.

Daran-Lapujade P, Jansen ML, Daran JM, van Gulik W, de Winde JH, Pronk JT. 2004. Role of transcriptional regulation in controlling fluxes in central carbon metabolism of Saccharomyces cerevisiae. A chemostat culture study. *The Journal of biological chemistry* **279**(10): 9125-9138.

De Nicola R, Hazelwood LA, De Hulster EA, Walsh MC, Knijnenburg TA, Reinders MJ, Walker GM, Pronk JT, Daran JM, Daran-Lapujade P. 2007. Physiological and transcriptional responses of Saccharomyces cerevisiae to zinc limitation in chemostat cultures. *Applied and environmental microbiology* **73**(23): 7680-7692.

Guldener U, Munsterkotter M, Kastenmuller G, Strack N, van Helden J, Lemer C, Richelles J, Wodak SJ, Garcia-Martinez J, Perez-Ortin JE et al. 2005. CYGD: the Comprehensive Yeast Genome Database. *Nucleic acids research* **33**(Database issue): D364-368.

Benton MG, Somasundaram S, Glasner JD, Palecek SP. 2006. Analyzing the dose-dependence of the Saccharomyces cerevisiae global transcriptional response to methyl methanesulfonate and ionizing radiation. *BMC genomics* **7**: 305.

Berry DB, Gasch AP. 2008. Stress-activated genomic expression changes serve a preparative role for impending stress in yeast. *Molecular biology of the cell* **19**(11): 4580-4587.

Boer VM, Tai SL, Vuralhan Z, Arifin Y, Walsh MC, Piper MD, de Winde JH, Pronk JT, Daran JM. 2007. Transcriptional responses of Saccharomyces cerevisiae to preferred and nonpreferred nitrogen sources in glucose-limited chemostat cultures. *FEMS yeast research* **7**(4): 604-620.

Bro C, Regenberg B, Lagniel G, Labarre J, Montero-Lomeli M, Nielsen J. 2003. Transcriptional, proteomic, and metabolic responses to lithium in galactose-grown yeast cells. *The Journal of biological chemistry* **278**(34): 32141-32149.

Bulik DA, Olczak M, Lucero HA, Osmond BC, Robbins PW, Specht CA. 2003. Chitin synthesis in Saccharomyces cerevisiae in response to supplementation of growth medium with glucosamine and cell wall stress. *Eukaryotic cell* **2**(5): 886-900.

Causton HC, Ren B, Koh SS, Harbison CT, Kanin E, Jennings EG, Lee TI, True HL, Lander ES, Young RA. 2001. Remodeling of yeast genome expression in response to environmental changes. *Molecular biology of the cell* **12**(2): 323-337.

Casamayor A, Serrano R, Platara M, Casado C, Ruiz A, Arino J. 2012. The role of the Snf1 kinase in the adaptive response of Saccharomyces cerevisiae to alkaline pH stress. *The Biochemical journal* **444**(1): 39-49.

Garcia R, Rodriguez-Pena JM, Bermejo C, Nombela C, Arroyo J. 2009. The high osmotic response and cell wall integrity pathways cooperate to regulate transcriptional responses to zymolyase-induced cell wall stress in Saccharomyces cerevisiae. *The Journal of biological chemistry* **284**(16): 10901-10911.

Gil FN, Goncalves AC, Jacinto MJ, Becker JD, Viegas CA. 2011. Transcriptional profiling in Saccharomyces cerevisiae relevant for predicting alachlor mechanisms of toxicity. *Environmental toxicology and chemistry / SETAC* **30**(11): 2506-2518.

Jansen ML, Daran-Lapujade P, de Winde JH, Piper MD, Pronk JT. 2004. Prolonged maltose-limited cultivation of Saccharomyces cerevisiae selects for cells with improved maltose affinity and hypersensitivity. *Applied and environmental microbiology* **70**(4): 1956-1963.

Jansen ML, Diderich JA, Mashego M, Hassane A, de Winde JH, Daran-Lapujade P, Pronk JT. 2005. Prolonged selection in aerobic, glucose-limited chemostat cultures of Saccharomyces cerevisiae causes a partial loss of glycolytic capacity. *Microbiology* **151**(Pt 5): 1657-1669.

Knijnenburg TA, de Winde JH, Daran JM, Daran-Lapujade P, Pronk JT, Reinders MJ, Wessels LF. 2007. Exploiting combinatorial cultivation conditions to infer transcriptional regulation. *BMC genomics* **8**: 25.
