# Supplementary material for: Preservation of genetic and regulatory robustness in ancient gene duplicates of Saccharomyces cerevisiae
Source: HighWire-hosted journal article supplement (doi:10.1101/gr.176792.114), 2014-08-22
Supplement: Supplemental_TableS7.docx [file Supplemental_TableS7.docx]

**Supplementary Table S7.**

| Condition | All duplicates | Singletons | WGDsa | SSDsb | Referencec |
| --- | --- | --- | --- | --- | --- |
| MethylMethanoSulfonate | 0.129 | 0.136 | 0.130 | 0.129 | ([Benton et al. 2006](#_ENREF_7)) |
| Gamma Radiation | 0.154 | 0.165 | 0.147 | 0.161 | ([Benton et al. 2006](#_ENREF_7)) |
| H2O2 Stress | 3.512 | 3.375 | 4.190 | 2.321 | ([Berry and Gasch 2008](#_ENREF_8)) |
| Nitrogen Source (L) | 0.085 | 0.075 | 0.0863 | 0.082 | ([Boer et al. 2007](#_ENREF_12)) |
| Nitrogen Source (F) | 0.086 | 0.083 | 0.087 | 0.085 | ([Boer et al. 2007](#_ENREF_12)) |
| Nitrogen Source (M) | 0.092 | 0.087 | 0.092 | 0.094 | ([Boer et al. 2007](#_ENREF_12)) |
| Lithium | 1.105 | 0.717 | 1.650 | 0.625 | ([Bro et al. 2003](#_ENREF_13)) |
| Cell wall stress | 0.507 | 0.418 | 0.454 | 0.554 | ([Bulik et al. 2003](#_ENREF_14)) |
| Osmotic stress | 1.511 | 1.752 | - | - | ([Garcia et al. 2009](#_ENREF_36)) |
| Peroxide stress | 0.972 | 0.583 | 0.934 | 1.173 | ([Causton et al. 2001](#_ENREF_18)) |
| Acid Stress | 0.725 | 0.272 | 1.115 | 0.314 | ([Casamayor et al. 2012](#_ENREF_17)) |
| Alkaline stress | 7.191 | 2.684 | 2.383 | 12.193 | ([Casamayor et al. 2012](#_ENREF_17)) |
| Heat stress | 0.27 | 0.49 | 0.23 | 0.342 | ([Berry and Gasch 2008](#_ENREF_8)) |
| Osmotic stress (NaCl) | 2.262 | 0.492 | 3.777 | 0.512 | ([Berry and Gasch 2008](#_ENREF_8)) |
| Oxidative stress | 0.019 | 0.016 | 0.0187 | 0.0193 | ([Aragon et al. 2006](#_ENREF_5)) |
| Acetate stress | 1.642 | 1. 654 | 1.853 | 1.409 | ([Daran-Lapujade et al. 2004](#_ENREF_26)) |
| Sorbitol stress | 0.765 | 0.348 | 1.054 | 0.423 | ([Causton et al. 2001](#_ENREF_18)) |
| Zinc limitation | 0.099 | 0.095 | 0.0996 | 0.101 | ([De Nicola et al. 2007](#_ENREF_27)) |
| Manganase impaired | 0.0483 | 0.0426 | 0.051 | 0.044 | ([Garcia-Rodriguez et al. 2012](#_ENREF_37)) |
| Alachlor toxicity | 0.021 | 0.019 | 0.0208 | 0.0212 | ([Gil et al. 2011](#_ENREF_39)) |
| Prolonged maltose limited | 0.151 | 0.163 | 0.146 | 0.155 | ([Jansen et al. 2004](#_ENREF_50)) |
| Prolonged glucose limited | 0.083 | 0.077 | 0.084 | 0.081 | ([Jansen et al. 2005](#_ENREF_51)) |
| Carbon-limited *vs* glucose-limited | 0.227 | 0.223 | 0.231 | 0.224 | ([Knijnenburg et al. 2007](#_ENREF_53)) |
| Carbon-limited *vs* nitrogen-limited | 0.126 | 0.116 | 0.128 | 0.124 | ([Knijnenburg et al. 2007](#_ENREF_53)) |
| Carbon-limited *vs* phosphorus-limited | 0.13 | 0.122 | 0.133 | 0.128 | ([Knijnenburg et al. 2007](#_ENREF_53)) |
| Carbon-limited *vs* sulphur-limited | 0.132 | 0.120 | 0.137 | 0.128 | ([Knijnenburg et al. 2007](#_ENREF_53)) |
| To fermentation | 5.647 | 3.271 | - | - | - |
| Wine fermentation | 0.174 | 0.174 | 0.175 | 0.171 |  |
| Lactic acid stress | 0.139 | 0.128 | 0.139 | 0.141 | ([Abbott et al. 2008](#_ENREF_1)) |
| High CO2 | 0.121 | 0.106 | 0.125 | 0.118 | ([Aguilera et al. 2005](#_ENREF_2)) |
| 5% Ethanol | 0.031 | 0.028 | 0.029 | 0.033 | ([Alper et al. 2006](#_ENREF_3)) |
| Stationary phase | 0.100 | 0.102 | 0.100 | 0.098 | ([Aragon et al. 2006](#_ENREF_5)) |
